## Tomatoes, Tomato-Based Products, Lycopene, and Cancer: Review of the Epidemiologic Literature

*Edward Giovannucci*

The epidemiologic literature in the English language regarding intake of tomatoes and tomato-based products and blood lycopene (a compound derived predominantly from tomatoes) level in relation to the risk of various cancers was reviewed. Among 72 studies identified, 57 reported inverse associations between tomato intake or blood lycopene level and the risk of cancer at a defined anatomic site; 35 of these inverse associations were statistically significant. No study indicated that higher tomato consumption or blood lycopene level statistically significantly increased the risk of cancer at any of the investigated sites. About half of the relative risks for comparisons of high with low intakes or levels for tomatoes or lycopene were approximately 0.6 or lower. The evidence for a benefit was strongest for cancers of the prostate, lung, and stomach. Data were also suggestive of a benefit for cancers of the pancreas, colon and rectum, esophagus, oral cavity, breast, and cervix. Because the data are from observational studies, a cause-effect relationship cannot be established definitively. However, the consistency of the results across numerous studies in diverse populations, for case-control and prospective studies, and for dietary-based and blood-based investigations argues against bias or confounding as the explanation for these findings. Lycopene may account for or contribute to these benefits, but this possibility is not yet proven and requires further study. Numerous other potentially beneficial compounds are present in tomatoes, and, conceivably, complex interactions among multiple components may contribute to the anticancer properties of tomatoes. The consistently lower risk of cancer for a variety of anatomic sites that is associated with higher consumption of tomatoes and tomato-based products adds further support for current dietary recommendations to increase fruit and vegetable consumption. [J Natl Cancer Inst 1999;91:317-31]

Nutritional factors are widely believed to be critical in carcinogenesis (1,2). Overwhelming evidence from epidemiologic studies indicates that diets high in fruits and vegetables are associated with a lower risk of numerous cancers (3-5). Dietary recommendations to increase intake of citrus fruits, cruciferous vegetables, green and yellow vegetables, and fruits and vegetables high in vitamins A and C to lower cancer risk have been made by several organizations, including the National Research Council of the National Academy of Sciences (1), the National Cancer Institute (6), the American Cancer Society (2,7), and the World Cancer Research Fund and the American Institute for Cancer Research (5). However, uncertainty exists concerning which components account for this benefit.

Until recently, the health aspects of tomatoes had received relatively little attention. The antioxidant properties of lycopene,

a carotenoid consumed largely from tomatoes, have raised interest in the tomato as a food with potential anticancer properties (8). Higher consumption of tomatoes is in fact compatible with current general recommendations aimed at increasing intake of fruits and vegetables. Nonetheless, whether unique benefits derive from tomatoes is important to establish because tomatoes are used in many processed items that are not necessarily identified with fruit or vegetable consumption. These items include tomato and spaghetti sauce, tomato soup, salsa, ketchup, and tomato paste. Moreover, many of these processed foods are better sources of bioavailable lycopene than are fresh tomatoes (9-11).

This review examines the epidemiologic evidence regarding consumption of tomato and related products with the risk of cancer at various body sites. The main purposes of this review are to assess the evidence for benefits by specific cancer site and to consider the strengths and limitations of the studies that help indicate whether observed associations are causal. Criteria considered include the strength of any associations, consistency of results by study design (case-control or cohort), method of exposure assessment (questionnaire or biomarker), the factors controlled for by matching or through data analysis, and the potential for residual or uncontrolled confounding. The potentially beneficial constituents of tomatoes and the implications for current dietary recommendations are then discussed.

### REVIEW OF EPIDEMIOLOGIC STUDIES

All human studies reported in the English language of tomatoes or lycopene in relation to the risk of any cancer were considered. These studies were found in the MEDLINE® or CANCELIT® databases and in several extensive reviews (3-5), or they were referenced in the identified studies. Because tomato intake or blood lycopene level was frequently one of numerous dietary factors examined, epidemiologic reports that had fruits, vegetables, or carotenoids as key words were scrutinized for results regarding tomato or lycopene. Two general types of study designs have been used to examine lycopene and tomato products in relation to risk of cancer. One study design has been based on a dietary questionnaire, used either to assess tomato products directly or to infer lycopene consumption; the other study design has been based on measuring levels of carotenoids in stored blood samples. Studies were summarized by type of

---

*Affiliations of author:* Channing Laboratory, Department of Medicine, Brigham and Women's Hospital and Harvard Medical School, and Departments of Nutrition and Epidemiology, Harvard School of Public Health, Boston, MA.

*Correspondence to:* Edward Giovannucci, M.D., Sc.D., Channing Laboratory, 181 Longwood Ave., Boston, MA 02115 (e-mail: edward.giovannucci@channing.harvard.edu).

See "Notes" following "References."

© Oxford University Press

design, years conducted, country, number of cases, main exposure assessment, relative risk (RR) with *P* values (two-sided) or confidence intervals (CIs), and covariates controlled for by matching or in analyses. The summarized RR is that for the cancer rate in the highest intake of tomatoes or level of lycopene divided by the rate in the lowest intake or plasma level. In case-control studies, the odds ratio was used to estimate the RR.

## TOTAL CANCER

Only one study has reported on tomato intake in relation to total cancer risk. In this prospective study by Colditz et al. (12), based on 42 cancer deaths among 1271 elderly persons, individuals who were in the top half of tomato consumption had a lower risk of all cancers combined compared with those in the bottom half (RR = 0.5; 95% CI = 0.3–0.8). Other items, including green and yellow vegetables and strawberries, were also associated with a decreased risk of total cancer. Carrots and squash were unrelated to risk. There were too few cancers to allow examination of specific cancer sites.

## LUNG AND PLEURAL CANCERS

One of the cancer sites for which a benefit of fruits and vegetables has been most apparent is for cancers of the lung (3), the leading cause of cancer death worldwide. Initial findings led investigators to focus on  $\beta$ -carotene and provided the impetus to examine supplemental  $\beta$ -carotene in relation to the risk of lung cancer in intervention trials. Unfortunately, the results from several trials either have been inconclusive (13) or have even indicated that smokers randomly assigned to receive  $\beta$ -carotene are at higher risk for lung cancer (14,15).

Although the focus has been on  $\beta$ -carotene, the literature shows that several fruit and vegetable groups, including leafy green and yellow/orange vegetables, are associated with a lower risk of lung cancer (3). Fourteen studies (16–29) have reported specifically on tomato or lycopene consumption in relation to lung cancer risk; of these, 10 (17,18,20–24,26–28) suggest either a statistically significant or a suggestive inverse association (Table 1). These studies, mostly case-control in design, generally adjusted for smoking history, the most important potential confounder for lung cancer. An additional study (30) indicated that higher prediagnostic dietary intake of tomatoes (recalled after diagnosis) among lung cancer case subjects was associated with better survival from lung cancer (Table 1). One study (22) found an inverse association between tomato intake and squamous cell and small-cell lung cancer but not with other histologic types. Statistically significant associations were observed in multiple U.S. populations, China, and Spain, and non-statistically significant inverse associations were noted in the U.K., Norway, and Finland.

A case-control study in Hawaii by Le Marchand et al. (17) found tomato intake related to a substantially reduced risk of lung cancer; however, the same case-control dataset analyzed several years later for lycopene intake (16) indicated only a modest inverse association between lycopene intake and lung cancer risk that was not statistically significant. In this population, tomatoes accounted for only 29% of the reported lycopene intake. The conflicting results for tomato and lycopene intakes suggest that the benefit of tomatoes is related to compounds other than lycopene or that lycopene from non-tomato sources is not readily bioavailable.

Only one study that reported on mesothelioma (cancer of the

pleura or peritoneum) was identified (31). Overall, a 40% reduction in risk was noted for those consuming tomato or tomato juice 16 or more times a month versus nonconsumers. Only 1.7% of control subjects reported not consuming tomatoes or tomato juice as opposed to 9% of case subjects, suggesting nonconsumers of tomato products to be at relatively high risk for mesothelioma.

## STOMACH CANCER

Although becoming relatively uncommon in most economically developed countries, stomach or gastric cancer remains one of the major causes of cancer death in the world. Twelve case-control studies from a variety of populations, including the United States [New York (32), Louisiana (33), and Hawaiian Japanese (34)], Japan (35), Israel (36), Italy (37–39), Spain (40,41), Poland (42), Belgium (43), and Sweden (44) have reported data on tomato or lycopene intake and stomach cancer risk (Table 2). Inverse associations between tomato consumption and risk of gastric cancer were observed in all these diverse populations except for Spain (40,41) and Japan (35). A suggestive, but not statistically significant, inverse association was observed in a study conducted in Belgium (43), but this study population had a very low consumption of tomatoes. An ecologic study in Japan (45) that examined plasma levels of various nutrients in samples of populations in various regions found that regions high in plasma lycopene had the lowest gastric cancer rates and regions low in lycopene had the highest rates. While other fruits and vegetables have frequently been inversely associated with gastric cancer, inverse associations with tomatoes have been among the most consistent and strongest (36–39,44). Although no prospective studies of tomato intake and gastric cancer were identified, the consistent inverse association observed in diverse populations strongly suggests a protective effect of tomato or lycopene consumption on gastric cancer.

## COLORECTAL CANCER

Cancers of the colorectum are common in economically developed areas. Five studies (37,46–50) have reported on tomato intake in relation to colorectal cancer risk (Table 3). One study in the United States (46) reported statistically significant inverse associations between tomato consumption and colon cancer risk for men and women. A study in Belgium (48) found no overall association but did find a suggestion of an inverse association between consumption of tomato puree and colon cancer risk. The consumption of tomato products was low in this population, and the contrast was ever versus never consumption; the impact of higher intakes could not be assessed. Case-control studies in Italy (37,50) and China (49) reported about a 60% reduction in risk of both colon and rectal cancers associated with higher tomato consumption. In a rodent model of *N*-methylnitrosourea-induced colonic aberrant crypt foci, lycopene and lutein, but not  $\beta$ -carotene, in relatively small doses demonstrated efficacy against this premalignant lesion (51).

## ORAL/LARYNGEAL/PHARYNGEAL CANCER

Only three case-control studies (52–54) have reported on tomato intake in relation to oral cancers (Table 3). One study in China (52) reported that high consumption of tomatoes was related to approximately half the risk of oral cancer. A similar finding was observed between tomato consumption and cancers

**Table 1.** Summary of epidemiologic studies examining tomato intake or lycopene intake or level and cancers of the lung and pleura

| First author, year of publication (reference No.) | Place of study                     | Years of study | Type of study                 | No. of case subjects | Exposure                                                             | Relative risk* (95% confidence interval)                                                                      | Adjusted factors                                                                    |
|---------------------------------------------------|------------------------------------|----------------|-------------------------------|----------------------|----------------------------------------------------------------------|---------------------------------------------------------------------------------------------------------------|-------------------------------------------------------------------------------------|
| Kvåle, 1983 (22)                                  | Norway, United States              | 1964–1978      | Cohort                        | 168                  | Tomato intake, 6–13 vs. <1/mo                                        | 0.87, <i>P</i> = .48 (total)<br>0.54, <i>P</i> = .07 (squamous cell and small-cell)                           | Age, smoking status, region, urban/rural                                            |
| Fraser, 1991 (19)                                 | California, Seventh-day Adventists | 1977–1982      | Cohort                        | 61                   | Tomato intake, ≥7 vs. <3/wk                                          | 1.24 (0.51–2.99)<br><i>P</i> = .79                                                                            | Age, sex, smoking status                                                            |
| Bond, 1987 (23)                                   | Texas                              | 1940–1980      | Case-control                  | 308                  | Tomato intake, 1/day vs. <1/mo                                       | 0.42 (0.14–1.33)<br><i>P</i> for trend = .05                                                                  | Age, race, smoking status, educational level, vitamin supplement                    |
| Le Marchand, 1989 (17), 1993 (16)                 | Hawaii                             | 1983–1985      | Case-control                  | 230 ♂<br>102 ♀       | Tomatoes†<br>Quintile 5 vs. 1<br>Lycopene intake<br>Quintile 5 vs. 1 | 0.43, <i>P</i> = .002 ♂<br>0.27, <i>P</i> < .001 ♀<br>0.67, <i>P</i> = .07 ♂<br>0.77, <i>P</i> = .83 ♀        | Age, ethnicity, smoking status, pack-years, cholesterol intake                      |
| Harris, 1991 (18)                                 | U.K.                               | 1979–1981      | Case-control                  | 96 ♂                 | Tomato intake, >29.1 vs. <1 g/day                                    | 0.69, <i>P</i> = .11                                                                                          | Age, smoking status                                                                 |
| Knekt, 1991 (21)                                  | Finland                            | 1966–1986      | Cohort                        | 117                  | Lycopene intake, μg, mean                                            | 684 ± 850 (mean ± standard deviation) case subjects<br>718 ± 895 (mean ± standard deviation) control subjects | Age                                                                                 |
| Candelora, 1992 (27)                              | Florida                            | 1987–?         | Case-control (nonsmokers)     | 124 ♀                | Lycopene<br>Quartile 4 vs. 1<br>Tomatoes<br>Quartile 4 vs. 1         | 0.6 (0.3–1.2)<br><i>P</i> = .13<br>0.7 (0.4–1.0)                                                              | Age, educational level, total calories, limited to nonsmokers                       |
| Forman, 1992 (24)                                 | China                              | 1985–1986      | Case-control                  | 183 ♂                | Tomatoes<br>Quartile 4 vs. 1                                         | 0.42 (0.19–0.96)<br><i>P</i> = .04                                                                            | Age, educational level, body mass index, smoking status, income                     |
| Goodman, 1992 (30)                                | Hawaii                             | 1979–1985      | Prognosis (death)             | 463 ♂<br>212 ♀       | Tomatoes‡<br>Quartile 4 vs. 1<br>Prediagnostic diet                  | 0.77, <i>P</i> < .01 ♂<br>0.5, <i>P</i> = .14 ♀                                                               | Age at diagnosis, stage, histology, body mass index, smoking status                 |
| Steinmetz, 1993 (25)                              | Iowa                               | 1986–1990      | Cohort                        | 138 ♀                | Lycopene-rich food intake, ≥5 vs. ≤1/wk                              | 1.21 (0.69–2.10)<br><i>P</i> = .53                                                                            | Age, energy, smoking status                                                         |
| Mayne, 1994 (20)                                  | New York State                     | 1982–1985      | Case-control                  | 413                  | Tomato and tomato products<br>Quartile 4 vs. 1                       | 0.80, NS ♂<br>0.76, NS ♀<br>0.79, <i>P</i> < .10 ♂ and ♀                                                      | Age, cigarette smoking status, religion, educational level, body mass index, income |
| Muscat, 1996 (31)                                 | New York                           | 1985–1993      | Case-control (mesothelioma)   | 94                   | Tomato/tomato juice intake, ≥16 vs. 0/mo                             | 0.6 (0.2–1.9)                                                                                                 | Age, educational level, religion, occupation                                        |
| Agudo, 1997 (28)                                  | Spain                              | 1989–1992      | Case-control                  | 103 ♀                | Tomatoes<br>High vs. low tertile                                     | 0.45 (0.22–0.91)<br><i>P</i> = .026                                                                           | Age, smoking status, total pack-years                                               |
| Comstock, 1997 (29)                               | Maryland                           | 1989–1991      | Cohort                        | 258                  | Serum lycopene<br>Quintile 5 vs. 1                                   | 1.01, <i>P</i> for trend = .97                                                                                | Age, race, sex, date of blood donation, smoking status                              |
| Li, 1997 (26)                                     | United States                      |                | Case-control (non-small cell) | 93                   | Plasma lycopene<br>Tertile 3 vs. 1                                   | 0.37, <i>P</i> = .01<br>African-Americans:<br>0.12, <i>P</i> = .001                                           | Age, sex, race                                                                      |

\*Relative risk and 95% confidence interval or *P* value (two-sided) for the exposure comparison indicated; in some cases, measures other than the relative risk were given. NS = not significant.

†Tomatoes accounted for only 29% of total lycopene.

‡For squamous cell cancer only.

**Table 2.** Summary of epidemiologic studies examining tomato intake or lycopene intake or level and cancer of the stomach

| First author, year of publication (reference No.) | Place of study    | Years of study | Type of study | No. of case subjects | Exposure                                                                  | Relative risk* (95% confidence interval)                                                                | Adjusted factors                                                                            |
|---------------------------------------------------|-------------------|----------------|---------------|----------------------|---------------------------------------------------------------------------|---------------------------------------------------------------------------------------------------------|---------------------------------------------------------------------------------------------|
| Haenszel, 1972 (34)                               | Hawaiian Japanese | 1963–1969      | Case–control  | 223                  | Tomato intake, $\geq 11$ vs. $< 4$ /mo                                    | 0.39, $P < .05$ , all<br>0.31, $P < .08$ , Issei<br>0.49, NS, Nisei                                     | Age, sex                                                                                    |
| Modan, 1981 (36)                                  | Israel            | 1967–1969      | Case–control  | 406                  | Tomato intake, daily vs. never                                            | 0.55, $P$ for trend $< .0001$                                                                           | Age, sex, ethnic origin                                                                     |
| Correa, 1985 (33)                                 | Louisiana         | 1979–1983      | Case–control  | 391                  | Tomatoes, “high vs. low” intake                                           | 0.82 (0.53–1.28), whites<br>0.56 (0.34–0.90), blacks                                                    | Age, sex, race, educational level, income, tobacco smoking status, alcohol intake           |
| Tajima, 1985 (35)                                 | Japan             | 1981–1983      | Case–control  | 93                   | Tomatoes Tertile 3 vs. 1                                                  | 1.24, NS                                                                                                | Age, sex                                                                                    |
| Franceschi, 1994 (37)<br>La Vecchia, 1987 (38)    | Italy (Milan)     | 1985–1991      | Case–control  | 723                  | Tomatoes Quartile 4 vs. 1                                                 | 0.43 (0.33–0.55)                                                                                        | Age, sex, study center, educational level, alcohol intake, tobacco smoking status, calories |
| Buiatti, 1989 (39)                                | Northern Italy    | 1985–1987      | Case–control  | 1016                 | Tomatoes Tertile 3 vs. 1                                                  | 0.70, $P$ for trend $< .001$                                                                            | Age, sex                                                                                    |
| Graham, 1990 (32)                                 | New York          | 1975–1985      | Case–control  | 293 (181 ♂)          | Tomatoes                                                                  | Decreasing risk<br>Statistically significant for ♂ only                                                 | Age, sex, neighborhood                                                                      |
| Boeing, 1991 (42)                                 | Poland            | 1986–1990      | Case–control  | 741                  | Tomatoes Tertile 3 vs. 1                                                  | 0.77, $P$ for trend = .03                                                                               | Age, sex, occupation, educational level, residence                                          |
| Gonzalez, 1991 (41)                               | Spain             | 1987–1989      | Case–control  | 354                  | Tomatoes Quartile 4 vs. 1                                                 | 0.9 (0.5–1.5)                                                                                           | Age, total calories, other food items                                                       |
| Ramón, 1993 (40)                                  | Spain             | 1986–1989      | Case–control  | 177                  | Tomatoes Tertile 3 vs. 1                                                  | 1.03, NS                                                                                                | Age, sex                                                                                    |
| Tsugane, 1992 (45)                                | Japan             | 1985–1989      | Ecologic      |                      | Plasma lycopene                                                           | Regions high in lycopene have lowest gastric cancer rates; low lycopene areas have highest cancer rates | Age                                                                                         |
| Tuyns, 1992 (43)                                  | Belgium           | 1979–1982      | Case–control  | 449                  | Cooked tomato intake, $> 0$ vs. 0<br>Raw tomato intake, $> 10$ vs. 0 g/wk | 0.12, $P = .50$<br>0.74, $P = .08$                                                                      | Age, sex, province, other vegetables                                                        |
| Hansson, 1993 (44)                                | Sweden            | 1989–1992      | Case–control  | 456                  | Adolescence, $> 3$ vs. 0/mo<br>20 y prior<br>$> 15$ vs. $< 2$ /mo         | 0.36 (0.23–0.58)<br>$P < .0001$<br>0.72 (0.47–1.11)<br>$P = .015$                                       | Age, sex, socioeconomic status                                                              |

\*Relative risk and 95% confidence interval or  $P$  value (two-sided) for exposure comparison indicated; in some cases, measures other than the relative risk were given. NS = not significant.

of the oral cavity and pharynx in Italy (54). A study of tomato consumption and laryngeal cancer in China (53) did not find an association.

## ESOPHAGEAL CANCER

Esophageal cancers have received little study regarding tomatoes and lycopene (Table 3). One study in Iran (55), which has extremely high rates of esophageal cancer particularly in men, found a 39% statistically significant reduction in risk for men who consumed tomatoes frequently, but no relationship was apparent for women. The only other diet-based study reported for this cancer, conducted in the United States (56), reported a 30% nonstatistically significant reduction in esophageal cancer

risk associated with high tomato consumption in men. A serum bank-based study by Nomura et al. (57) reported that case patients with oral, laryngeal, or esophageal cancers had a 5% lower mean prediagnostic serum lycopene level than control subjects that was not statistically significant; however, on the basis of only 28 case patients with esophageal cancer, case patients had a 16.4% lower lycopene level ( $P = .08$ ).

## PANCREATIC CANCER

Four studies (58–61) have examined tomato or lycopene status in relation to risk of pancreatic cancer; all of these studies support an inverse association (Table 3). Two studies (58,61) reported an inverse association but did not provide estimates of

**Table 3.** Summary of epidemiologic studies examining tomato intake or lycopene intake or level and cancers of the digestive tract (excluding stomach)\*

| First author, year of publication (reference No.) | Place of study         | Years of study | Type of study                   | No. of case subjects | Exposure                                                               | Relative risk† (95% confidence interval)                                                                                  | Adjusted factors                                                                                        |
|---------------------------------------------------|------------------------|----------------|---------------------------------|----------------------|------------------------------------------------------------------------|---------------------------------------------------------------------------------------------------------------------------|---------------------------------------------------------------------------------------------------------|
| <b>Colorectal cancer</b>                          |                        |                |                                 |                      |                                                                        |                                                                                                                           |                                                                                                         |
| Tuyns, 1988 (48)                                  | Belgium                | 1978–1982      | Case-control (colon, rectal)    | 453 C<br>365 R       | Tomato intake, >0 vs. 0 g/wk<br>Tomato puree intake, >0 vs. 0 g/wk     | 1.15, <i>P</i> = .31 C<br>1.03, <i>P</i> = .84 R<br>0.78, <i>P</i> = .12 C<br>0.93, <i>P</i> = .93 R                      | Age, sex, province                                                                                      |
| Freudenheim, 1990 (46)                            | New York State         | 1978–1986      | Case-control (rectal)           | 277 ♂<br>145 ♀       | Tomatoes                                                               | SS decreased risk<br>SS decreased risk                                                                                    | Age                                                                                                     |
| Hu, 1991 (49)                                     | China                  | 1985–1988      | Case-control (colon, rectal)    | 111 C<br>225 R       | 1966 diet (>15 kg/y)<br>1985 diet (>15 kg/y)<br>♂ rectal 1966 >20 kg/y | 0.40 (0.17–0.94) C ♂<br>0.26 (0.12–0.55) C ♀<br>0.40 (0.17–0.94) R ♂<br>NS R ♀                                            | Univariate                                                                                              |
| Centonze, 1994 (47)                               | Southern Italy         | 1987–1989      | Case-control (colorectal)       | 132                  | Pizza, high vs. low intake                                             | 0.89 (0.51–1.53)<br><i>P</i> = .66                                                                                        | Age, sex, educational level, smoking status, modification of diet in past                               |
| Franceschi, 1994 (37)<br>Franceschi, 1997 (50)    | Northern Italy         | 1985–1991      | Case-control (colon, rectal)    | 955 C<br>629 R       | Tomatoes<br>Quartile 4 vs. 1                                           | 0.39 (0.31–0.49) C<br>0.42 (0.32–0.55) R                                                                                  | Age, sex, study center, educational level, calories, alcohol intake, smoking status                     |
| <b>Oral cancers</b>                               |                        |                |                                 |                      |                                                                        |                                                                                                                           |                                                                                                         |
| Franceschi, 1991 (54)                             | Northern Italy         | 1985–?         | Case-control (oral and pharynx) | 266 ♂<br>36 ♀        | Fresh tomatoes<br>Tertile 3 vs. 1                                      | 0.5, <i>P</i> < .01                                                                                                       | Age, sex, occupation, smoking status, alcohol intake, other significant foods                           |
| Zheng, 1992 (53)                                  | China                  | 1988–1990      | Case-control (larynx)           | 177 ♂<br>24 ♀        | Tomatoes<br>Tertile 3 vs. 1                                            | 1.2, <i>P</i> = .45 ♂<br>1.1 (0.4–3.1) ♀                                                                                  | Age, educational level, smoking status                                                                  |
| Zheng, 1993 (52)                                  | China                  | 1989           | Case-control (oral)             | 404                  | Tomato intake, ≥1/day vs. ≤3/wk                                        | 0.49 (0.26–0.94)                                                                                                          | Age, tobacco smoking status, alcohol intake, dentition, body mass index, energy, educational level, sex |
| <b>Esophageal and laryngeal cancers</b>           |                        |                |                                 |                      |                                                                        |                                                                                                                           |                                                                                                         |
| Cook-Mozaffari, 1979 (55)                         | Iran                   | 1975–1976      | Case-control (esophagus)        | 217 ♂<br>127 ♀       | Raw tomato intake, ≥1/wk vs. <1/mo                                     | 0.61 (0.43–0.86) ♂<br>1.08 (0.69–1.67) ♀                                                                                  | Age, region                                                                                             |
| Brown, 1988 (56)                                  | South Carolina         | 1982–1984      | Case-control (esophagus)        | 207 ♂                | Tomatoes, high vs. low intake                                          | 0.70 (0.4–1.4)                                                                                                            | Age, cigarette smoking status, alcohol intake                                                           |
| Nomura, 1997 (57)                                 | Hawaii                 | 1971–1991      | Cohort (esophagus and larynx)   | 69                   | Serum lycopene (mean)                                                  | Case subjects 19.1 ± 1.4 (mean ± standard error)<br>Control subjects 21.1 ± 1.0 (mean ± standard error)<br><i>P</i> = .27 | Age, smoking history (detailed), alcohol intake                                                         |
| <b>Pancreatic cancer</b>                          |                        |                |                                 |                      |                                                                        |                                                                                                                           |                                                                                                         |
| Mills, 1988 (58)                                  | Seventh-day Adventists | 1976–1983      | Cohort (fatal)                  | 50                   | Tomatoes                                                               | Inverse association (na)                                                                                                  | Age                                                                                                     |
| Burney, 1989 (59)                                 | Maryland               | 1975–1986      | Cohort                          | 22                   | Serum lycopene<br>High vs. lowest 2 tertiles                           | 0.16 (0.04–0.57)<br><i>P</i> for trend < .02                                                                              | Age, sex, race, hours since last meal, smoking status, educational level                                |
| Baghurst, 1991 (61)                               | Australia              | 1984–1987      | Case-control                    | 104                  | Tomatoes                                                               | Inverse trend, <i>P</i> < .05, ♂ only                                                                                     | Age                                                                                                     |
| Bueno de Mesquita, 1991 (60)                      | The Netherlands        | 1984–1988      | Case-control                    | 164                  | Tomatoes<br>Quintile 5 vs. 1                                           | 0.23, <i>P</i> < .05                                                                                                      | Age, sex, smoking status, energy                                                                        |

\*C = colon; R = rectum.

†Relative risk and 95% confidence interval or *P* value (two-sided) for the exposure comparison indicated; in some cases, measures other than the relative risk were given. SS = statistically significant; NS = not significant; na = *P* value not available.

RR. The two that reported the magnitude of the RR found about a fourfold to fivefold risk elevation among low consumers of tomatoes (60) or among those with low levels of serum lycopene collected prospectively in a case-control study nested within a cohort (59). Although the serum-based study (59) involved only 22 case patients, the results were statistically significant ( $P < .02$ ), and no association was seen with total carotenoids or  $\beta$ -carotene. It is unlikely that low lycopene levels were the result of the cancer because the relationship was apparent in cancers diagnosed 9–12 years after collection of the blood and pancreatic cancers are rapidly progressive and thus have a short latent period. Also suggestive of a specific effect of lycopene among carotenoids, the dietary-based study by Bueno de Mesquita et al. (60) did not find a benefit of carrots, a major source of  $\beta$ -carotene and  $\alpha$ -carotene.

## PROSTATE CANCER

Four cohort studies (62–65) report data on the relationship between tomato or lycopene consumption and prostate cancer risk (Table 4). In a cohort of 14 000 Seventh-day Adventist men (62), only tomato intake and intake of beans, lentils, and peas were statistically significantly related to lower prostate cancer risk in a multivariate analysis.  $\beta$ -Carotene-rich foods were unrelated to risk. In a larger, more comprehensive dietary study (64), intake of the carotenoids  $\beta$ -carotene,  $\alpha$ -carotene, lutein, and  $\beta$ -cryptoxanthin was not associated with risk of prostate cancer, but high lycopene intake was related to a statistically significant 21% reduction in risk. High intake of tomatoes and tomato products, which accounted for 82% of lycopene, reduced risk of total prostate cancer by 35% and aggressive prostate cancer by 53%. Tomato sauce had the strongest inverse association with prostate cancer risk (RR = 0.66; 95% CI = 0.49–0.90;  $P$  for trend = .001), and weaker inverse associations were observed with tomatoes and pizza, but none with tomato juice. Preliminary results from two other cohort studies (63,65) also support this finding.

One case-control study conducted in Minnesota (66) found an inverse association between tomato intake and risk of prostate cancer that was not statistically significant. In another case-control study conducted in a multiethnic population in Hawaii (67), no association was found with consumption of “tomatoes.” However, the intake levels were not indicated, and it did not appear that tomato-based products such as tomato sauce were specifically addressed. A case-control study conducted in the U.K. (68) found no association between raw or cooked tomatoes and risk of prostate cancer. Of note, the strongest dietary association found in that study was for baked beans (RR = 0.52; 95% CI = 0.31–0.88); the authors suggest that tinned baked beans may provide highly bioavailable lycopene from the tomato sauce.

Three studies (69–71) have examined serum carotenoids using prediagnostic samples in relation to prostate cancer risk. The first study (69), which was based on serum obtained in 1974 from 25 802 persons in Washington County, MD, found a 6.2% lower median lycopene level in prostate cancer case subjects diagnosed during 13 years compared with age- and race-matched control subjects. The estimated RR was 0.50 (95% CI = 0.20–1.29) between high and low quartiles of lycopene. No other carotenoid was associated with prostate cancer risk. Preliminary results from the Physicians’ Health Study (70), which was based on 581 case subjects, found a statistically significant

RR of 0.56 (95% CI = 0.34–0.91) when comparing high quintile with low quintile of plasma lycopene.

A serum-based study conducted during the period from 1971 through 1993 in a Japanese-American population in Hawaii (71) did not detect any association between serum lycopene levels and risk of prostate cancer. However, several characteristics of the study may have contributed to the lack of an association, including use of a single assessment of serum lycopene to characterize follow-up for up to a 22-year period (only 14 cases occurred within the first 5 years of follow-up), inclusion of “low virulence” disease (28% were diagnosed incidentally during surgery for benign prostatic hyperplasia), and very low serum lycopene levels [the median serum concentration among control subjects was only 134 ng/mL, compared with 320 ng/mL in the study by Hsing et al. (69) and 424 ng/mL in the sample of 121 health professionals (64)]. Ethnic differences in prostate cancer etiology may also be important, inasmuch as men of Asian descent may have an inherently low susceptibility to prostate cancer.

## BLADDER CANCER

Four reports of tomato or lycopene consumption (72–74) or serum lycopene (75) and risk of bladder cancer were identified (Table 4). None of these studies found statistically significant associations with risk of bladder cancer, although tendencies for inverse associations were noted. Results from the sole serum-based study (75) were suggestive of an inverse trend (RR = 0.5;  $P$  for trend = .06). However, that study was based on only 35 case subjects. Unpublished data from a prospective cohort study of male health professionals do not indicate any association between consumption of tomato-based products or lycopene and bladder cancer (251 cases). A strong inverse association between tomato-based product intake and risk of prostate cancer was found in the same cohort (64). In a rat model of urinary superficial bladder cancer induced by nitrosamines, lycopene demonstrated modest anticancer properties (76).

## BREAST CANCER

For breast cancer, a common cause of cancer in Western countries, an overall benefit of fruits and vegetables is suggested but is not as clearly apparent as for several other cancer sites (3,4). Considering the importance of this disease, relatively few studies have examined its relationship to tomato or lycopene intake (Table 5). Dietary-based studies (77–80) do not support an association between tomato intake and risk of breast cancer, although relatively few studies have reported on this. However, of four studies (81–84) based on biomarkers (blood level or breast adipose level) of lycopene, three (81,82,84) support a benefit, two of which were statistically significant (81,82). The small study (81) based on adipose levels of carotenoids in breast tissue from case and control subjects did find statistically significantly lower concentrations of lycopene among case subjects, although an impact of the cancer on tissue lycopene levels cannot be excluded. Of note, breast adipose tissue lycopene was weakly correlated with lycopene intake estimated by a food-frequency questionnaire in that study ( $r = .17$ ). It is possible that a low correlation between reported intake and tissue level, whether due to measurement or biologic reasons, could account for the generally null results from dietary studies for breast cancer. Lycopene also has been shown to have antiproliferative effects against breast cancer cells in culture (85), and tomato oleoresin-treated rats developed fewer 7,12-dimethyl-

**Table 4.** Summary of epidemiologic studies examining tomato intake or lycopene intake or level and cancer of the genitourinary tract

| First author, year of publication (reference No.) | Place of study                    | Years of study | Type of study        | No. of case subjects      | Exposure                                                                    | Relative risk* (95% confidence interval)                             | Adjusted factors                                                                                                |
|---------------------------------------------------|-----------------------------------|----------------|----------------------|---------------------------|-----------------------------------------------------------------------------|----------------------------------------------------------------------|-----------------------------------------------------------------------------------------------------------------|
| <b>Prostate cancer</b>                            |                                   |                |                      |                           |                                                                             |                                                                      |                                                                                                                 |
| Schuman, 1982 (66)                                | Minnesota                         | 1976–1979      | Case–control         | 223                       | Tomatoes, high vs. low intake                                               | 0.70, NS                                                             | Age                                                                                                             |
| Mills, 1989 (62)                                  | California Seventh-day Adventists | 1974–1982      | Cohort               | 180                       | Tomato intake, $\geq 5$ vs. $< 1$ /wk                                       | 0.60 (0.37–0.97)<br>$P = .02$                                        | Age, educational level, consumption of meat, poultry, fish, beans, legumes, peas, citrus fruit, nuts, or fruits |
| Hsing, 1990 (69)                                  | Maryland                          | 1974–1985      | Cohort               | 103                       | Serum lycopene Quartile 4 vs. 1                                             | 0.50 (0.20–1.29)<br>$P = .26$                                        | Age, smoking status, race, educational level, hours since last meal                                             |
| Le Marchand, 1991 (67)                            | Hawaii                            | 1970–1983      | Case–control         | 452                       | Lycopene Quartile 4 vs. 1                                                   | 0.9 $P = .35$ , $< 70$ y<br>1.1, $P = .57$ , $\geq 70$ y             | Age, ethnicity                                                                                                  |
| Giovannucci, 1995 (64)                            | United States                     | 1986–1992      | Cohort               | 773                       | Dietary tomato-based products, $> 10$ vs. $< 1.5$ servings/wk               | 0.65 (0.44–0.95)<br>$P = .01$                                        | Age, total energy, ancestry, vasectomy, animal fat, retinol                                                     |
|                                                   |                                   |                |                      |                           | Tomato sauce intake, 2–4 vs. 0/wk                                           | 0.66 (0.49–0.90)<br>$P = .001$                                       |                                                                                                                 |
| Baldwin, 1997 (abstract) (65)                     | California                        | 1995           | Cohort retrospective |                           | “Consistently high tomato consumption”                                      | 0.59, $P = .03$                                                      | —                                                                                                               |
| Key, 1997 (68)                                    | U.K.                              | 1989–1992      | Case–control         | 328                       | Dietary lycopene intake, $\geq 718$ $\mu\text{g}$ vs. $< 402$ $\mu\text{g}$ | 0.99 (0.68–1.45)<br>$P = .88$                                        | Age, social class                                                                                               |
|                                                   |                                   |                |                      |                           | Raw tomato intake, $\geq 5$ /wk vs. $\leq 3$ /mo                            | 1.06 (0.55–1.62)<br>$P = .88$                                        |                                                                                                                 |
|                                                   |                                   |                |                      |                           | Cooked tomato intake, $\geq 2$ /wk vs. $< 1$ /mo                            | 0.92 (0.57–1.42)<br>$P = .64$                                        |                                                                                                                 |
| Nomura, 1997 (71)                                 | Hawaii                            | 1971–1993      | Cohort               | 142                       | Serum lycopene Quartile 4 vs. 1                                             | 1.1 (0.5–2.2)<br>$P = 0.86$                                          | Age                                                                                                             |
| Cerhan, 1998 (abstract) (63)                      | United States                     | 1987–1990      | Cohort               | 101                       | Dietary tomatoes Quintile 5 vs. 1                                           | 0.50 (0.3–0.9)<br>$P = .03$                                          | Age, total energy, other dietary and nondietary factors                                                         |
| Gann, 1998 (abstract) (70)                        | United States                     | 1982–1995      | Cohort               | 581                       | Plasma lycopene Quintile 5 vs. 1                                            | 0.56 (0.34–0.91)<br>$P = .05$                                        | Age, smoking status, body mass index, alcohol consumption, exercise, multivitamin use, plasma cholesterol level |
| <b>Bladder cancer</b>                             |                                   |                |                      |                           |                                                                             |                                                                      |                                                                                                                 |
| Helzlsouer, 1989 (75)                             | Maryland                          | 1974–1986      | Cohort               | 35                        | Serum lycopene Tertile 3 vs. 1                                              | 0.5, $P$ for trend = .06                                             | Age, sex, race, interval since last meal                                                                        |
| Nomura, 1991 (74)                                 | Hawaii                            | 1977–1986      | Case–control         | 195 $\delta$<br>66 $\eta$ | Lycopene Quintile 5 vs. 1                                                   | 0.7, $P$ for trend = .27 $\delta$<br>0.9, $P$ for trend = .41 $\eta$ | Age, cigarette pack-years                                                                                       |
| Riboli, 1991 (73)                                 | Spain                             | 1985–1986      | Case–control         | 432 $\delta$              | Tomatoes                                                                    | No association                                                       | Age                                                                                                             |
| Bruemmer, 1996 (72)                               | Washington State                  | 1987–1990      | Case–control         | 262                       | Tomato intake, $> 0.29$ vs. $\leq 0.07$ /day                                | 0.71 (0.39–1.29)<br>$P$ for trend = .13                              | Age, sex, county, smoking status, calories                                                                      |

\*Relative risk and 95% confidence interval or  $P$  value (two-sided) for the exposure comparison indicated; in some cases, measures other than the relative risk were given. NS = not significant.

benz[*a*]anthracene-induced mammary tumors, whereas  $\beta$ -carotene had no effect (86).

### CERVICAL CANCER AND PRECURSORS

Two studies have reported on tomato consumption and risk of cervical cancer (87,88), and three have examined serum lycopene in relation to cervical cancer (89,90) or precursor lesions (91) (Table 5). Monthly tomato consumption was higher in control subjects than in case subjects in one case–control study (87), although this finding did not attain statistical significance. A study in The Netherlands (88) found women who consumed tomatoes three or more times a week to have a 40% reduction in

benz[*a*]anthracene-induced mammary tumors, whereas  $\beta$ -carotene had no effect (86).

**Table 5.** Summary of epidemiologic studies examining tomato intake or lycopene intake or level and cancers of female reproductive organs

| First author, year of publication (reference No.) | Place of study  | Years of study | Type of study                     | No. of case subjects | Exposure                                                                                         | Relative risk* (95% confidence interval)                     | Adjusted factors                                                                                                                                                                                                         |
|---------------------------------------------------|-----------------|----------------|-----------------------------------|----------------------|--------------------------------------------------------------------------------------------------|--------------------------------------------------------------|--------------------------------------------------------------------------------------------------------------------------------------------------------------------------------------------------------------------------|
| <b>Breast cancer</b>                              |                 |                |                                   |                      |                                                                                                  |                                                              |                                                                                                                                                                                                                          |
| Ewertz, 1990 (79)                                 | Denmark         | 1983–1984      | Case-control                      | 1486                 | Tomatoes<br>Quartile 4 vs. 1                                                                     | 1.04 (0.79–1.31)                                             | Age, residence                                                                                                                                                                                                           |
| Potischman, 1990 (84)                             | New York State  | 1985–1986      | Case-control                      | 83                   | Plasma lycopene<br>Quartile 4 vs. 1                                                              | 0.62 (0.19–2.0)<br><i>P</i> = .43                            | Age, age at first birth, family history of cancer, age at menarche, body mass index, age at menopause, income, marital status, plasma cholesterol level, triglyceride level                                              |
| London, 1992 (83)                                 | Massachusetts   | 1986–1988      | Case-control                      | 377                  | Serum lycopene<br>Quintile 5 vs. 1                                                               | 1.0 (0.7–1.7)                                                | Age, alcohol consumption, age at first birth, parity, family history of cancer, age at menopause, age at menarche, body weight, benign breast disease                                                                    |
| Levi, 1993 (78)                                   | Switzerland     | 1990–1992      | Case-control                      | 107                  | Tomatoes<br>Tertile 3 vs. 1                                                                      | 0.9, NS                                                      | Age                                                                                                                                                                                                                      |
| Freudenheim, 1996 (80)                            | New York State  | 1986–1991      | Case-control                      | 297                  | Lycopene intake, $\geq 7123$ $\mu\text{g}/\text{day}$ vs. $\leq 3775$ $\mu\text{g}/\text{day}$   | 0.87 (0.55–1.39)<br><i>P</i> = .24                           | Age, educational level, age at first birth, age at menarche, family history of cancer, benign breast disease, body mass index, energy                                                                                    |
| Järvinen, 1997 (77)                               | Finland         | 1967–1992      | Cohort                            | 88                   | Lycopene<br>Tertile 3 vs. 1                                                                      | ~1.0                                                         | Age, body mass index, parity, region, smoking status, occupation                                                                                                                                                         |
| Zhang, 1997 (81)                                  | Massachusetts   | 1989–1992      | Case-control (breast adipose)     | 46                   | Breast adipose lycopene levels, $\geq$ vs. $<$ median                                            | 0.32 (0.11–0.94)                                             | Age, smoking status, menopausal status                                                                                                                                                                                   |
| Dorgan, 1998 (82)                                 | Missouri        | 1977–1987      | Cohort                            | 105                  | Serum lycopene levels, $>0.51$ $\mu\text{mol}/\text{L}$ vs. $\leq 0.22$ $\mu\text{mol}/\text{L}$ | 0.5 (0.2–1.2)<br><i>P</i> = .02                              | Age, benign breast disease, serum cholesterol level, cigarette smoking status, body mass index                                                                                                                           |
| <b>Cervical cancer</b>                            |                 |                |                                   |                      |                                                                                                  |                                                              |                                                                                                                                                                                                                          |
| Marshall, 1983 (87)                               | New York State  | 1957–1965      | Case-control                      | 513                  | Tomato intake, mean monthly servings                                                             | 8.02, case subject<br>8.49, control subject<br><i>P</i> = .2 | Age                                                                                                                                                                                                                      |
| de Vet, 1991 (88)                                 | The Netherlands | 1984–1987      | Case-control (cervical dysplasia) | 257                  | Tomato intake, $\geq 3$ vs. 0/wk                                                                 | 0.58 (0.33–1.02)<br><i>P</i> = .01                           | Age, demographics, marital status, educational level, smoking status, children, contraception, age at first intercourse, frequency of intercourse, sexual partners, frequency of pap smear, other food group consumption |
| Potischman, 1991 (89)                             | Latin America   | 1986–1987      | Case-control                      | 387                  | Serum lycopene level, $>21.4$ $\mu\text{g}/\text{dL}$ vs. $<6.4$ $\mu\text{g}/\text{dL}$         | 1.14 (0.8–2.1)<br><i>P</i> = .69                             | Age, study site, age at first intercourse, No. of sex partners, No. of pregnancies, Pap smear, papillomavirus 16/18, No. of household facilities, cholesterol level, level of triglycerides                              |

**Table 5 (continued).** Summary of epidemiologic studies examining tomato intake or lycopene intake or level and cancers of female reproductive organs

| First author, year of publication (reference No.) | Place of study | Years of study | Type of study                                                  | No. of case subjects                                   | Exposure                                          | Relative risk* (95% confidence interval) | Adjusted factors                                                                                                       |
|---------------------------------------------------|----------------|----------------|----------------------------------------------------------------|--------------------------------------------------------|---------------------------------------------------|------------------------------------------|------------------------------------------------------------------------------------------------------------------------|
| VanEenwyk, 1991 (91)                              | Illinois       | 1987–1989      | Case-control (cervical intraepithelial neoplasm I, II, or III) | 102                                                    | Serum lycopene level, >41.3 µg/dL vs. <21.3 µg/dL | 0.26 (0.08–0.9)<br>P = .004              | Age, smoking status, income, vitamin C, Pap smear frequency, spermicidal contraception, genital warts, body mass index |
|                                                   |                |                |                                                                |                                                        | Diet lycopene Quartile 4 vs. 1                    | 0.19 (0.04–0.77)<br>P = .02              |                                                                                                                        |
| Batieha, 1993 (90)                                | Maryland       | 1975–1990      | Case-control                                                   | 50†<br>18 (invasive)<br>32 (carcinoma <i>in situ</i> ) | Serum lycopene level, >41.8 µg/dL vs. <24.9 µg/dL | 0.40 (0.15–1.04)<br>P = .08              | Age, race, time since last meal                                                                                        |
|                                                   |                |                |                                                                | <b>Ovarian cancer</b>                                  |                                                   |                                          |                                                                                                                        |
| Helzlsouer, 1996 (92)                             | Maryland       | 1974–1989      | Cohort                                                         | 35                                                     | Serum lycopene level, >35.2 µg/dL vs. <21.9 µg/dL | 1.36 (0.4–4.3)<br>P = .59                | Age, menstrual status, hours since last meal prior to collection                                                       |

\*Relative risk and 95% confidence interval or *P* value (two-sided) for the exposure comparison indicated; in some cases, measures other than the relative risk were given. NS = not significant.

†The relative risk is only for all 50 cases; the 50 cases comprise 18 invasive carcinomas and 32 carcinomas *in situ*; results are not presented for the 18 and 32 cases individually.

risk of cervical dysplasia relative to nonconsumers. One study (89) found no association between serum lycopene and risk of cervical cancer, but another study (90) found a borderline statistically significant inverse association between serum lycopene and risk of invasive (*n* = 18) or preinvasive (*n* = 32) cervical cancer. A study of cervical cancer precursor lesions (cervical intraepithelial neoplasm [CIN] I, II, III) (91) found a fourfold higher risk in women with low serum lycopene levels and a fivefold excess risk among those with low dietary lycopene levels. Thus, three of three studies of preinvasive lesions reported an inverse association with tomato intake (88) or serum lycopene (90,91). In one study (90), levels of serum carotenoids were also related to lower risk, whereas the study by VanEenwyk et al. (91) found benefits only for lycopene.

## OVARIAN CANCER

Only one study that reported data regarding tomato or lycopene and ovarian cancer was found. This was a prospective serum-based study of 35 case subjects (Table 5) (92). This small study indicated no association, although the mean level of serum lycopene in the case subjects was 7.4% lower than in the control subjects. More study of this cancer is clearly required before firmer conclusions can be reached.

## SUMMARY OF EPIDEMIOLOGIC EVIDENCE

### Consistency of Results

Including studies that have reported results but did not specify RRs, 72 studies have reported on intake of tomatoes, tomato-based products, and lycopene or blood or tissue level of lycopene and risk of a cancer site. These were based on 66 reports, some of which separately analyzed various cancer sites (e.g., colon and rectum). Of these 72 studies, 57 found inverse associations between tomato or lycopene consumption or blood

lycopene level and risk of cancer; 35 of these inverse associations were statistically significant. The remaining 15 studies were inconclusive or indicated a slight direct association, with RRs mostly within the range between 1.0 and 1.2. No statistically significant direct association between tomato or lycopene consumption and risk for any cancer site was noted.

Table 6 shows the RRs from 61 studies that provide data; there are 74 RRs because some studies present results stratified by sex, racial or ethnic group, colon and rectum cancers separately, and results both for blood lycopene level and for dietary tomato or lycopene intakes. Almost half the studies found RRs around 0.6 or less, about two thirds with RRs less than 0.8. The results did not vary appreciably whether they were based

**Table 6.** Summary of the relative risks for high versus low intakes (levels) of tomatoes (lycopene) across the study characteristics

| Study type       | Total No. (%) | No. (%) by relative risk |          |          |         |
|------------------|---------------|--------------------------|----------|----------|---------|
|                  |               | ≤0.6                     | 0.61–0.8 | 0.81–1.0 | >1.0    |
| Cohort           | 16 (100)      | 10 (63)                  | 0 (0)    | 1 (6)    | 5 (31)  |
| Case-control     | 58 (100)      | 26 (45)                  | 13 (22)  | 10 (17)  | 9 (16)  |
| Diet based       | 59 (100)      | 27 (46)                  | 12 (20)  | 11 (19)  | 9 (15)  |
| Biomarker* based | 15 (100)      | 9 (60)                   | 1 (7)    | 0 (0)    | 5 (33)  |
| Both sexes       | 33 (100)      | 18 (55)                  | 5 (15)   | 6 (18)   | 4 (12)  |
| Male             | 20 (100)      | 10 (50)                  | 6 (30)   | 2 (10)   | 2 (10)  |
| Female           | 21 (100)      | 8 (38)                   | 2 (10)   | 3 (14)   | 8 (38)  |
| Total†           | 74 (100)      | 36 (49)                  | 13 (18)  | 11 (15)  | 14 (19) |

\*14 blood-based and one study based on lycopene level in breast adipose tissue.

†From 61 studies that provided data (17–20,22–29,31,33–37,39–44,47–49,52–56,59,60,62–72,74,75,77–84,86,88–92); there are 74 relative risks because some studies present results stratified by sex, racial or ethnic group, colon and rectum cancers separately, and results both for blood lycopene level and for dietary tomato or lycopene intakes.

on prospective or retrospective data or whether they were based on dietary intakes or blood lycopene levels. The RRs (two-sided  $P$  values) for biomarker-based studies are 0.16 ( $P < .02$ ), 0.26 ( $P = .004$ ), 0.32 ( $P < .05$ ), 0.37 ( $P = .01$ ), 0.4 ( $P = .08$ ), 0.5 ( $P = .02$ ), 0.5 ( $P = .06$ ), 0.50 ( $P = .26$ ), 0.56 ( $P = .05$ ), 0.62 (not significant), 1.01 ( $P = .97$ ), 1.0 (not significant), 1.1 ( $P = .86$ ), 1.14 ( $P = .69$ ), and 1.36 ( $P = .59$ ). Of these 15 studies, 10 had RRs less than or equal to 0.62, and eight were statistically significant or of borderline statistical significance ( $P \leq .08$ ), and in five of the studies (59,69,70,75,91), an inverse relationship was limited to lycopene among carotenoids.

Comparisons by sex tended to show more studies with inverse associations for males, but most studies also supported a benefit for women (Table 6). Cancers, such as those of the lung or stomach, for which both sexes are at risk, do not indicate strong differences in findings by sex. Evidence for a benefit was strong for prostate cancer. For several female-associated cancers, particularly cancers of the ovary and endometrium, data are very sparse.

RR estimates for the various cancers are shown in Fig. 1. The tendency for an inverse association between consumption of tomatoes or tomato products or lycopene levels is observed for a variety of cancer sites. The data are most compelling for cancers of the prostate gland, lung, and stomach. Data are also suggestive for several other cancers, including pancreatic, colorectal, esophageal, oral, breast, and cervical cancers. Data regarding the relationship between tomato consumption or lycopene level and cancer risk for other cancer sites are too limited at present to support firm conclusions.

In summary, the epidemiologic data indicate that high consumers of tomatoes and tomato products are at substantially decreased risk of numerous cancers, although probably not all cancers. The results are consistent for a variety of cancers across numerous diverse populations and with the use of different types of study designs. These include ecologic, case-control dietary studies, prospective dietary studies, and blood specimen-based investigations. Because the evidence available is based on observational studies, and thus causality cannot be directly inferred, the possibility for biases and confounding is considered next.



Fig. 1. Summary relative risks (RR) for high versus low consumption of tomatoes or level of lycopene from epidemiologic studies. • = statistically significant; ○ = not statistically significant.

## Potential for Bias and Confounding as Explaining the Results

Biases occur when, through faulty data-collection techniques, the associations in the study population are distorted. For example, in some case-control studies, for which the disease status is known at the time of interview, case subjects may recall past diet differently from control subjects. Biases possibly may have occurred in specific settings, but that a single, strong methodologic bias accounts for all these findings is not plausible. Recall biases, for instance, cannot account for associations observed in prospective studies, particularly those based on blood levels of lycopene rather than on dietary recall.

Publication bias (e.g., results reported in the literature only from studies that found a relationship) is unlikely to be of major importance for our overall findings because, if no underlying association existed, one would expect as many direct associations as inverse associations to be reported. Here, 35 statistically significant inverse associations were identified, but none with direct associations were found. However, for specific cancer sites for which only a small number of reports have been published, selective publication may be a potential factor.

Although systematic errors or bias in reporting tomato or lycopene intake cannot account for all the findings, it is possible that the association between high tomato consumption and lower risk for numerous cancers is not causal but rather is secondary to some confounding factor(s) associated with tomato intake. This possibility cannot be ruled out entirely, but it is unlikely for several reasons. For confounding to occur, the confounding factor has to be simultaneously an important risk or protective factor for that cancer and correlated substantially with tomato intake. As shown in the tables, known or suspected risk factors were controlled for in many of the studies. In general, confounding from the considered factors did not account for the observed relationships.

It is possible that some unidentified confounding factor accounted for these associations. However, given the variety of cancers studied, the different etiologies for cancers, and the diversity of populations studied, uncontrolled confounding is unlikely to account for most of the inverse associations with tomatoes or lycopene. The pattern of potentially confounding factors for tomato products will likely vary among cancers, which have different risk factors. Moreover, dietary patterns differ among countries, and at least one statistically significant inverse association for tomato products was observed in 10 countries (United States, Italy, Holland, Spain, Sweden, Poland, Australia, Iran, China, and Japan). The pattern of covariates will also likely vary by type of tomato product. For example, in the Health Professionals Follow-up Study (64), fresh tomatoes tended to be associated with "healthy" lifestyle practices, tomato sauce displayed no discernible pattern, and pizza was associated slightly with "unhealthy" practices, yet all three items were inversely associated with risk of prostate cancer.

The inverse association between plasma lycopene level and cancers of the prostate, lung, cervix, breast, and pancreas is particularly interesting because plasma and tissue lycopene levels are poorly correlated with overall vegetable and fruit intake because of the diverse nature of tomato products [ $r = .11$  (93);  $r = .11$  in women and  $.16$  in men (94)]. Unlike lycopene levels, most other carotenoid levels correlate reasonably well with vegetable and fruit intake (93,94). Furthermore, in a study of a

general U.S. population, lower serum concentrations of  $\beta$ -carotene,  $\alpha$ -carotene, lutein, and  $\beta$ -cryptoxanthin were generally associated with male sex, higher alcohol intake, increased smoking, and higher body mass index; dietary and serum lycopene levels were not associated with these factors (95). Thus, it is unlikely that the inverse association between plasma lycopene level and risk of various cancers is a result of lycopene's being a nonspecific marker of fruit and vegetable intake or related "healthy" behaviors.

### Dose-Response Relationship

Although most studies indicate an anticancer benefit of tomato consumption, it is difficult to draw firm conclusions regarding the dose-response relationship. For the most part, RRs appeared to decrease proportionally to increasing intake of tomatoes or related products. Within the observable range, there was no firm evidence of an intake level where the trend toward decreasing risk begins to reverse, although few data are available regarding intakes of tomatoes or tomato-based products exceeding one serving per day. Caution is advisable regarding pharmacologic doses of lycopene because all of the epidemiologic data are based on typical dietary intakes. Moreover, one animal study of lung cancer (96) suggests a benefit of lycopene intake at lower levels but possibly an adverse effect of lycopene intake at very high levels. Benefits may also vary by the specific type of tomato products because processing and cooking may influence the level or bioavailability of the bioactive compounds (e.g., lycopene).

### POTENTIALLY BENEFICIAL ASPECTS OF TOMATOES AND TOMATO-BASED PRODUCTS

Tomato and tomato-based products are important sources of many established nutrients and are predominant sources of some phytochemicals that may have health benefits. Tomatoes are relatively rich sources of folate, vitamin C, vitamin A, and potassium. Because other good sources of these nutrients are available, the relative importance of tomatoes as contributors of these nutrients varies across populations. In the United States, consumption of tomatoes and tomato products ranks number two to potatoes among vegetables (97). Because they are highly consumed, tomatoes and related products rank as the number three contributor of vitamin C and the number four contributor of provitamin A and are the ninth highest contributor of potassium to the U.S. diet. In Italy, tomatoes have been estimated as the second most important source of vitamin C after oranges (98). In contrast, tomato consumption in some populations appears to be too low for them to be a good source of these nutrients [e.g., the study by Tuyns et al. (43) in Belgium]. Anticancer properties for several of these nutrients have been hypothesized.

In addition to being a substantial source of some traditional nutrients, tomatoes are rich in several phytochemicals believed to have anticancer properties. Among the most prominent phytochemicals in tomatoes are the carotenoids, important pigments found in plants, and photosynthetic bacteria, fungi, and algae. These organisms synthesize phytoene, a 40-carbon molecule with 9 double bonds (in the *trans* configuration), which serves as a precursor for more than 600 carotenoids. A series of desaturation steps leads sequentially to phytofluene,  $\zeta$ -carotene, neurosporene, and lycopene, a symmetrical, acyclic 40-carbon molecule with 13 double bonds (11 conjugated). Enzymatic cyclization of the end groups of lycopene results in  $\gamma$ -carotene

(one  $\beta$ -ionone ring) and  $\beta$ -carotene (two  $\beta$ -ionone rings). The  $\beta$ -ionone rings are critical for vitamin A activity; other ring structures formed are devoid of vitamin A activity. Thus, cleavage of  $\gamma$ -carotene forms one vitamin A molecule, while cleavage of  $\beta$ -carotene leads to two vitamin A molecules. Oxygenation of the  $\beta$ -ionone rings leads to the more polar oxycarotenoids or xanthophylls, such as  $\beta$ -cryptoxanthin (one oxygenated ring, half the provitamin A activity of  $\beta$ -carotene) and lutein (two oxygenated rings and hence no provitamin A activity).

Plants vary substantially in their overall production of carotenoids and in the activities of various enzymes involved in desaturation, cyclization, and oxygenation to produce a wide range of carotenoids. For example, the red color of tomatoes results from lycopene, suggesting that red tomatoes have insufficient cyclase activity to convert lycopene to  $\gamma$ -carotene and  $\beta$ -carotene efficiently. Variation in different strains of tomatoes exists, as evidenced by yellow tomatoes, which are relatively low in lycopene. Among foods typically consumed by humans, tomatoes are a particularly rich source of several carotenoids. Of 14 carotenoids found in human serum, tomato and tomato-based products contribute to nine and are the predominant source of about half of the carotenoids (99). Tomatoes are low in  $\beta$ -carotene (most of the provitamin A activity from tomatoes is from  $\gamma$ -carotene) and low in the polar xanthophylls, but they are by far the major source of the remaining nonpolar carotenoids.

Overall, tomatoes are an important source of several nutrients and a predominant source of several carotenoids, particularly lycopene. Very few items other than tomato products contribute to dietary lycopene; these include watermelon, pink grapefruit, and apricots. Tomatoes are also a source of other potentially beneficial phytochemicals, including phenylpropanoids (phenolic acids), phytosterols, and flavonoids (97). However, the biologic relevance of these latter compounds, plus the relative importance of tomatoes as a dietary source of these, is unknown.

### BIOLOGIC PLAUSIBILITY OF AN ANTICANCER EFFECT OF LYCOPENE

Lycopene has received the most attention, but whether apparent anticancer properties of tomatoes result from lycopene remains unproven. Nonetheless, lycopene has several notable characteristics that may confer potentially beneficial properties. Because lycopene is not converted to vitamin A, it may be entirely available for other properties (e.g., antioxidation). The lack of the  $\beta$ -ionone ring structure for lycopene may increase its antioxidant activity (100). The stereochemical properties of lycopene are quite different from those of other commonly consumed carotenoids (101), making it uniquely present in specific subcellular environments. Lycopene appears to be the most efficient quencher of singlet oxygen and free radicals among the common carotenoids *in vitro* (8,102-104). In some populations, lycopene is the predominant carotenoid in plasma (105-107) and in various tissues (108,109).

The unique biochemical properties of lycopene may render it able to protect cellular components against specific types of damage from highly reactive oxygen species. The source of the reactive compounds differs by tissue type and includes smoking, sunlight, chronic inflammation, and normal metabolic processes (110-112). For example, smokers' lungs are exposed to high levels of nitric oxide (NO), which can react with oxygen to produce the  $\text{NO}_2\cdot$  radical.  $\text{NO}_2$  radicals survive for long enough in fresh smoke to reach lung tissue (113). Lycopene is one of the

major carotenoids found in lung tissue, and concentrations vary widely among individuals (114). Using an *in vitro* assay, Böhm et al. (115) showed that carotenoids are effective in protecting lymphocytes from NO<sub>2</sub> radical damage and that lycopene was at least twice as effective as  $\beta$ -carotene. Lycopene was shown to possess anticancer properties in a mouse lung carcinogenesis model (96).

Chronic infection by *Helicobacter pylori* is a major established risk factor for gastric cancer. Chronic infections may increase cancer risk by increasing the oxidative load (116). Elevated DNA oxidation occurs early during *H. pylori* infection (117). Dietary antioxidants, including lycopene, may potentially reduce the impact of oxidative load from *H. pylori* infections in the stomach. Another potential contributing factor to stomach cancer is the endogenous formation of *N*-nitrosamines. Vitamin C has been considered to be an inhibitor of the nitrosation that generates *N*-nitrosamines. It is interesting that an ecologic study in Japan (45), an area with a high incidence of stomach cancer, showed no association between average plasma vitamin C level and stomach cancer, and, in fact, the area with the lowest gastric cancer incidence had the lowest vitamin C level. In contrast, plasma lycopene level was associated with stomach cancer rate more so than the levels of other "antioxidant" nutrients assessed (vitamins A, C, and E and  $\beta$ -carotene) (45). A study of determinants of endogenous generation of *N*-nitrosamine in rats (118) suggested that various aspects of food products may explain their inhibitory effect, including pH, and ascorbic acid, lycopene, and  $\beta$ -carotene contents. Tomato and tomato-based products are the predominant sources of lycopene and one of the major sources of ascorbic acid in some populations.

Reactive oxygen compounds may contribute to prostate carcinogenesis (119,120). Prostate epithelial cells in many men at the age of risk for prostate cancer are likely to be exposed to inflammatory-related reactive oxygen species because of the high prevalence of prostatitis. However, whether an antioxidant property accounts for the apparent benefit of tomato product consumption on prostate cancer risk remains unproven.

If oxidation proves critical to carcinogenesis, the dietary contribution to antioxidation is likely to be immensely complex. Synergy among antioxidants exists in experimental systems (121), and synergistic effects are likely to be more complex *in vivo*. For example, synergy between  $\alpha$ -tocopherol and ascorbic acid is well established (121), resulting from the ability of ascorbic acid to reduce  $\alpha$ -tocopheroxyl radicals, thereby recycling  $\alpha$ -tocopherol. Complex synergistic effects may occur as a result of such direct interactions (e.g., recycling), different abilities of antioxidants to scavenge the various reactive oxygen species thus enhancing overall protection (103), and the localization of different antioxidants in diverse subcellular compartments. Possibly, the benefits of tomatoes may result from the complex interaction of various carotenoids, ascorbic acid, and other antioxidant polyphenolic compounds.

Although the notion that lycopene may exert its role in humans through limiting cellular macromolecule damage from reactive oxygen species is appealing, other mechanisms may be operative. In addition, preliminary *in vitro* evidence indicates that lycopene reduces cellular proliferation of various cancer cell lines induced by insulin-like growth factor-I (IGF-I) (85). This finding, which requires confirmation, is intriguing, given recent evidence that the circulating level of IGF-I is positively associated with higher risk of various cancers, including prostate can-

cer (122). Various other potential mechanisms have been postulated (100,108,123,124). Most of the mechanistic data have been based on *in vitro* studies, but a recent study (125) found that supplementation with tomato products, as well as carrot and spinach products, resulted in a marked decrease in endogenous levels of strand breaks in lymphocyte DNA. More human studies are clearly needed.

## CONCLUSIONS

Intake of tomatoes and tomato-based products and plasma levels of lycopene, a carotenoid found predominantly in tomatoes, have been relatively consistently associated with a lower risk of a variety of cancers. Evidence is strongest for cancers of the lung, stomach, and prostate gland and is suggestive for cancers of the cervix, breast, oral cavity, pancreas, colorectum, and esophagus. A large body of evidence also indicates that other fruits and vegetables may have additional or complementary benefits (3–5). The likelihood that the associations between increased consumption of tomato and tomato-based products and lower risk for several cancer sites are causal is supported by the consistency of evidence by study design (ecologic, case-control, and prospective) and by exposure assessment (dietary-based and plasma-based) and by the unlikelihood that biases or uncontrolled confounding could plausibly account for all these associations in diverse populations. These findings add further support to current dietary recommendations to increase consumption of fruits and vegetables to reduce cancer risk.

The benefits of tomatoes and tomato products are often attributed to the carotenoid lycopene. However, a direct benefit of lycopene has not been proven, and other compounds in tomatoes alone or interacting with lycopene may be important. It is critical to recognize that the current evidence regarding dietary intake and lycopene blood concentrations reflects consumption of tomatoes and tomato products rather than purified lycopene supplements. The pharmacokinetic properties of lycopene remain poorly understood, and it is premature to recommend use of pharmacologic doses of lycopene for any health benefit. Further research on the bioavailability, pharmacology, and biology of this potentially important carotenoid is clearly warranted. Until more definitive data regarding specific benefits of purified forms of lycopene are available, current recommendations should emphasize the health benefits of diets rich in a variety of fruits and vegetables, including tomatoes and tomato-based products.

## REFERENCES

- (1) U.S. National Research Council, Committee on Diet and Health. Diet and health: implications for reducing chronic disease risk. Washington (DC): National Academy Press; 1989.
- (2) American Cancer Society. Nutrition and cancer: causation and prevention. An American Cancer Society special report. CA Cancer J Clin 1984;34:5–10.
- (3) Steinmetz KA Potter JD. Vegetables, fruit, and cancer. I. Epidemiology. Cancer Causes Control 1991;2:325–57.
- (4) Block G, Patterson B, Subar A. Fruit, vegetables, and cancer prevention: a review of the epidemiological evidence. Nutr Cancer 1992;18:1–29.
- (5) World Cancer Research Fund American Institute for Cancer Research. Food, nutrition and the prevention of cancer: a global perspective. Washington (DC): American Institute for Cancer Research; 1997.
- (6) National Cancer Institute. Diet, nutrition, and cancer prevention: a guide to food choices. Washington (DC): U.S. Govt Print Off; 1987.
- (7) The American Cancer Society 1996 Advisory Committee on Diet, Nutrition, and Cancer Prevention. Guidelines on diet, nutrition, and cancer

- prevention: reducing the risk of cancer with healthy food choices and physical activity. *CA Cancer J Clin* 1996;46:325–41.
- (8) Di Mascio P, Kaiser S, Sies H. Lycopene as the most efficient biological carotenoid singlet oxygen quencher. *Arch Biochem Biophys* 1989;274:532–8.
  - (9) Stahl W, Sies H. Uptake of lycopene and its geometrical isomers is greater from heat-processed than from unprocessed tomato juice in humans. *J Nutr* 1992;122:2161–6.
  - (10) Tonucci LH, Holden JM, Beecher GR, Khachik F, Davis CS, Mulokozi G. Carotenoid content of thermally processed tomato-based food products. *J Agric Food Chem* 1995;43:579–86.
  - (11) Gartner C, Stahl W, Sies H. Lycopene is more bioavailable from tomato paste than from fresh tomatoes. *Am J Clin Nutr* 1997;66:116–22.
  - (12) Colditz GA, Branch LG, Lipnick RJ, Willett WC, Rosner B, Posner BM, et al. Increased green and yellow vegetable intake and lowered cancer deaths in an elderly population. *Am J Clin Nutr* 1985;41:32–6.
  - (13) Hennekens CH, Buring JE, Manson JE, Stampfer M, Rosner B, Cook NR, et al. Lack of effect of long-term supplementation with beta carotene on the incidence of malignant neoplasms and cardiovascular disease. *N Engl J Med* 1996;334:1145–9.
  - (14) The Alpha-Tocopherol, Beta-Carotene Cancer Prevention Study Group. The effect of vitamin E and beta carotene on the incidence of lung cancer and other cancers in male smokers. *N Engl J Med* 1994;330:1029–35.
  - (15) Omenn GS, Goodman GE, Thornquist MD, Balmes J, Cullen MR, Glass A, et al. Effects of a combination of beta carotene and vitamin A on lung cancer and cardiovascular disease. *N Engl J Med* 1996;334:1150–5.
  - (16) Le Marchand L, Hankin JH, Kolonel LN, Beecher GR, Wilkens LR, Zhao LP. Intake of specific carotenoids and lung cancer risk [published erratum appears in *Cancer Epidemiol Biomarkers Prev* 1994;3:523]. *Cancer Epidemiol Biomarkers Prev* 1993;2:183–7.
  - (17) Le Marchand L, Yoshizawa CN, Kolonel LN, Hankin JH, Goodman MT. Vegetable consumption and lung cancer risk: a population-based case-control study in Hawaii. *J Natl Cancer Inst* 1989;81:1158–64.
  - (18) Harris RW, Key TJ, Silcocks PB, Bull D, Wald NJ. A case-control study of dietary carotene in men with lung cancer and in men with other epithelial cancers. *Nutr Cancer* 1991;15:63–8.
  - (19) Fraser GE, Beeson WL, Phillips RL. Diet and lung cancer in California Seventh-day Adventists. *Am J Epidemiol* 1991;133:683–93.
  - (20) Mayne ST, Janerich DT, Greenwald P, Chorost S, Tucci C, Zaman MB, et al. Dietary beta carotene and lung cancer risk in U.S. nonsmokers. *J Natl Cancer Inst* 1994;86:33–8.
  - (21) Knekt P, Jarvinen R, Seppanen R, Rissanen A, Aromaa A, Heinonen OP, et al. Dietary antioxidants and the risk of lung cancer. *Am J Epidemiol* 1991;134:471–9.
  - (22) Kvale G, Bjelke E, Gart JJ. Dietary habits and lung cancer risk. *Int J Cancer* 1983;31:397–405.
  - (23) Bond GG, Thompson FE, Cook RR. Dietary vitamin A and lung cancer: results of a case-control study among chemical workers. *Nutr Cancer* 1987;9:109–21.
  - (24) Forman MR, Yao SX, Graubard BI, Qiao YL, McAdams M, Mao BL, et al. The effect of dietary intake of fruits and vegetables on the odds ratio of lung cancer among Yunnan tin miners. *Int J Epidemiol* 1992;21:437–41.
  - (25) Steinmetz KA, Potter JD, Folsom AR. Vegetables, fruit, and lung cancer in the Iowa Women's Health Study. *Cancer Res* 1993;53:536–43.
  - (26) Li Y, Elie M, Blaner WS, Brandt-Rauf P, Ford J. Lycopene, smoking and lung cancer [abstract]. *Proc Annu Meet Am Assoc Cancer Res* 1997;38:A758.
  - (27) Candelora EC, Stockwell HG, Armstrong AW, Pinkham PA. Dietary intake and risk of lung cancer in women who never smoked. *Nutr Cancer* 1992;17:263–70.
  - (28) Agudo A, Esteve MG, Pallares C, Martinez-Ballarín I, Fabregat X, Malats N, et al. Vegetable and fruit intake and the risk of lung cancer in women in Barcelona, Spain. *Eur J Cancer* 1997;33:1256–61.
  - (29) Comstock GW, Alberg AJ, Huang HY, Wu K, Burke AE, Hoffman SC, et al. The risk of developing lung cancer associated with antioxidants in the blood: ascorbic acid, carotenoids,  $\alpha$ -tocopherol, selenium, and total peroxyl radical absorbing capacity. *Cancer Epidemiol Biomarkers Prev* 1997;6:907–16.
  - (30) Goodman MT, Hankin JH, Wilkens LR, Kolonel LN. High-fat foods and the risk of lung cancer. *Epidemiology* 1992;3:288–99.
  - (31) Muscat JE, Huncharek M. Dietary intake and the risk of malignant mesothelioma. *Br J Cancer* 1996;73:1122–5.
  - (32) Graham S, Haughey B, Marshall J, Brasure J, Zielezny M, Freudenheim J, et al. Diet in the epidemiology of gastric cancer. *Nutr Cancer* 1990;13:19–34.
  - (33) Correa P, Fontham E, Pickle LW, Chen V, Lin Y, Haenszel W. Dietary determinants of gastric cancer in south Louisiana inhabitants. *J Natl Cancer Inst* 1985;75:645–54.
  - (34) Haenszel W, Kurihara M, Segi M, Lee RK. Stomach cancer among Japanese in Hawaii. *J Natl Cancer Inst* 1972;49:969–88.
  - (35) Tajima K, Tominaga S. Dietary habits and gastro-intestinal cancer: a comparative case-control study of stomach and large intestinal cancers in Nagoya, Japan. *Jpn J Cancer Res* 1985;76:705–16.
  - (36) Modan B, Cuckle H, Lubin F. A note on the role of dietary retinol and carotene in human gastro-intestinal cancer. *Int J Cancer* 1981;28:421–4.
  - (37) Franceschi S, Bidoli E, La Vecchia C, Talamini R, D'Avanzo B, Negri E. Tomatoes and risk of digestive-tract cancers. *Int J Cancer* 1994;59:181–4.
  - (38) La Vecchia C, Negri E, Decarli A, D'Avanzo B, Franceschi S. A case-control study of diet and gastric cancer in northern Italy. *Int J Cancer* 1987;40:484–9.
  - (39) Buiatti E, Palli D, Decarli A, Amadori D, Avellini C, Bianchi S, et al. A case-control study of gastric cancer and diet in Italy. *Int J Cancer* 1989;44:611–6.
  - (40) Ramon JM, Serra L, Cerdo C, Oromi J. Dietary factors and gastric cancer risk. A case-control study in Spain. *Cancer* 1993;71:1731–5.
  - (41) Gonzalez CA, Sanz JM, Marcos G, Pita S, Brullet E, Saigi E, et al. Dietary factors and stomach cancer in Spain: a multi-centre case-control study. *Int J Cancer* 1991;49:513–9.
  - (42) Boeing H, Jedrychowski W, Wahrendorf J, Popiela T, Tobiasz-Adamczyk B, Kulig A. Dietary risk factors in intestinal and diffuse types of stomach cancer: a multicenter case-control study in Poland. *Cancer Causes Control* 1991;2:227–33.
  - (43) Tuyns AJ, Kaaks R, Haelterman M, Riboli E. Diet and gastric cancer. A case-control study in Belgium. *Int J Cancer* 1992;51:1–6.
  - (44) Hansson LE, Nyren O, Bergstrom R, Wolk A, Lindgren A, Baron J, et al. Diet and risk of gastric cancer. A population-based case-control study in Sweden. *Int J Cancer* 1993;55:181–9.
  - (45) Tsugane S, Tsuda M, Gey F, Watanabe S. Cross-sectional study with multiple measurements of biological markers for assessing stomach cancer risks at the population level. *Environ Health Perspect* 1992;98:207–10.
  - (46) Freudenheim JL, Graham S, Marshall JR, Haughey BP, Wilkinson G. A case-control study of diet and rectal cancer in western New York. *Am J Epidemiol* 1990;131:612–24.
  - (47) Centonze S, Boeing H, Leoci C, Guerra V, Misciagna G. Dietary habits and colorectal cancer in a low-risk area. Results from a population-based case-control study in southern Italy. *Nutr Cancer* 1994;21:233–46.
  - (48) Tuyns AJ, Kaaks R, Haelterman M. Colorectal cancer and the consumption of foods: a case-control study in Belgium. *Nutr Cancer* 1988;11:189–204.
  - (49) Hu JF, Liu YY, Yu YK, Zhao TZ, Liu SD, Wang QQ. Diet and cancer of the colon and rectum: a case-control study in China. *Int J Epidemiol* 1991;20:362–7.
  - (50) Franceschi S, Favero A, La Vecchia C, Negri E, Conti E, Montella M, et al. Food groups and risk of colorectal cancer in Italy. *Int J Cancer* 1997;72:56–61.
  - (51) Narisawa T, Fukaura Y, Hasebe M, Ito M, Aizawa R, Murakoshi M, et al. Inhibitory effects of natural carotenoids,  $\alpha$ -carotene,  $\beta$ -carotene, lycopene and lutein, on colonic aberrant crypt foci formation in rats. *Cancer Lett* 1996;107:137–42.
  - (52) Zheng T, Boyle P, Willett WC, Hu H, Dan J, Evstifeeva TV, et al. A case-control study of oral cancer in Beijing, People's Republic of China. Associations with nutrient intakes, foods and food groups. *Eur J Cancer B Oral Oncol* 1993;29B:45–55.
  - (53) Zheng W, Blot WJ, Shu XO, Gao YT, Ji BT, Ziegler RG, et al. Diet and other risk factors for laryngeal cancer in Shanghai, China. *Am J Epidemiol* 1992;136:178–91.
  - (54) Franceschi S, Bidoli E, Baron AE, Barra S, Talamini R, Serraino D, et al.

- Nutrition and cancer of the oral cavity and pharynx in north-east Italy. *Int J Cancer* 1991;47:20–5.
- (55) Cook-Mozaffari PJ, Azordegan F, Day NE, Ressaicaud A, Sabai C, Aramesh B. Oesophageal cancer studies in the Caspian Littoral of Iran: results of a case-control study. *Br J Cancer* 1979;39:293–309.
- (56) Brown LM, Blot WJ, Schuman SH, Smith VM, Ershow AG, Marks RD, et al. Environmental factors and high risk of esophageal cancer among men in coastal South Carolina. *J Natl Cancer Inst* 1988;80:1620–5.
- (57) Nomura AM, Ziegler RG, Stemmermann GN, Chyou PH, Craft NE. Serum micronutrients and upper aerodigestive tract cancer. *Cancer Epidemiol Biomarkers Prev* 1997;6:407–12.
- (58) Mills PK, Beeson WL, Abbey DE, Fraser GE, Phillips RL. Dietary habits and past medical history as related to fatal pancreas cancer risk among Adventists. *Cancer* 1988;61:2578–85.
- (59) Burney PG, Comstock GW, Morris JS. Serologic precursors of cancer: serum micronutrients and the subsequent risk of pancreatic cancer. *Am J Clin Nutr* 1989;49:895–900.
- (60) Bueno de Mesquita HB, Maisonneuve P, Runia S, Moerman CJ. Intake of foods and nutrients and cancer of the exocrine pancreas: a population-based case-control study in The Netherlands. *Int J Cancer* 1991;48:540–9.
- (61) Baghurst PA, McMichael AJ, Slavotinek AH, Baghurst KI, Boyle P, Walker AM. A case-control study of diet and cancer of the pancreas. *Am J Epidemiol* 1991;134:167–79.
- (62) Mills PK, Beeson WL, Phillips RL, Fraser GE. Cohort study of diet, lifestyle, and prostate cancer in Adventist men. *Cancer* 1989;64:598–604.
- (63) Cerhan J, Chiu B, Putnam S, Parker A, Robbins M, Lynch C, et al. A cohort study of diet and prostate cancer risk [abstract]. *Cancer Epidemiol Biomarkers Prev* 1998;7:175.
- (64) Giovannucci E, Ascherio A, Rimm EB, Stampfer MJ, Colditz GA, Willett WC. Intake of carotenoids and retinol in relation to risk of prostate cancer. *J Natl Cancer Inst* 1995;87:1767–76.
- (65) Baldwin D, Naco G, Petersen F, Fraser G, Ruckle H. The effect of nutritional and clinical factors upon serum prostate specific antigen and prostate cancer in a population of elderly California men [abstract]. Presented at the 1997 annual meeting of the American Urological Association, New Orleans, LA.
- (66) Schuman LM, Mandel JS, Radke A, Seal U, Halberg F. Some selected features of the epidemiology of prostatic cancer: Minneapolis-St. Paul, Minnesota case-control study, 1976–1979. In: Magnus K, editor. *Trends in cancer incidence: causes and practical implications*. Washington (DC): Hemisphere Publishing Corp.;1982. p. 345–54.
- (67) Le Marchand L, Hankin JH, Kolonel LN, Wilkens LR. Vegetable and fruit consumption in relation to prostate cancer risk in Hawaii: a reevaluation of the effect of dietary beta-carotene. *Am J Epidemiol* 1991;133:215–9.
- (68) Key TJ, Silcocks PB, Davey GK, Appleby PN, Bishop DT. A case-control study of diet and prostate cancer. *Br J Cancer* 1997;76:678–87.
- (69) Hsing AW, Comstock GW, Abbey H, Polk BF. Serologic precursors of cancer. Retinol, carotenoids, and tocopherol and risk of prostate cancer. *J Natl Cancer Inst* 1990;82:941–6.
- (70) Gann PH, Ma J, Giovannucci E, Willett W, Sacks F, Hennekens CH, et al. A prospective analysis of plasma antioxidants and prostate cancer risk [abstract]. *Proc Am Assoc Cancer Res* 1998;39:89.
- (71) Nomura AM, Stemmermann GN, Lee J, Craft NE. Serum micronutrients and prostate cancer in Japanese Americans in Hawaii. *Cancer Epidemiol Biomarkers Prev* 1997;6:487–91.
- (72) Bruemmer B, White E, Vaughan TL, Cheney CL. Nutrient intake in relation to bladder cancer among middle-aged men and women. *Am J Epidemiol* 1996;144:485–95.
- (73) Riboli E, Gonzalez CA, Lopez-Abente G, Errezola M, Izarzugaza I, Escolar A, et al. Diet and bladder cancer in Spain: a multi-centre case-control study. *Int J Cancer* 1991;49:214–9.
- (74) Nomura AM, Kolonel LN, Hankin JH, Yoshizawa CN. Dietary factors in cancer of the lower urinary tract. *Int J Cancer* 1991;48:199–205.
- (75) Helzlsouer KJ, Comstock GW, Morris JS. Selenium, lycopene,  $\alpha$ -tocopherol,  $\beta$ -carotene, retinol, and subsequent bladder cancer. *Cancer Res* 1989;49:6144–8.
- (76) Okajima E, Ozono S, Endo T, Majima T, Tsutsumi M, Fukuda T, et al. Chemopreventive efficacy of piroxicam administered alone or in combination with lycopene and beta-carotene on the development of rat urinary bladder carcinoma after *N*-butyl-*N*-(4-hydroxybutyl)nitrosamine treatment. *Jpn J Cancer Res* 1997;88:543–52.
- (77) Jarvinen R, Knekt P, Seppanen R, Teppo L. Diet and breast cancer risk in a cohort of Finnish women. *Cancer Lett* 1997;114:251–3.
- (78) Levi F, La Vecchia C, Gulie C, Negri E. Dietary factors and breast cancer risk in Vaud, Switzerland. *Nutr Cancer* 1993;19:327–35.
- (79) Ewertz M, Gill C. Dietary factors and breast-cancer risk in Denmark. *Int J Cancer* 1990;46:779–84.
- (80) Freudenheim JL, Marshall JR, Vena JE, Laughlin R, Brasure JR, Swanson MK, et al. Premenopausal breast cancer risk and intake of vegetables, fruits, and related nutrients. *J Natl Cancer Inst* 1996;88:340–8.
- (81) Zhang S, Tang G, Russell RM, Mayzel KA, Stampfer MJ, Willett WC, et al. Measurement of retinoids and carotenoids in breast adipose tissue and a comparison of concentrations in breast cancer cases and control subjects. *Am J Clin Nutr* 1997;66:626–32.
- (82) Dorgan JF, Sowell A, Swanson CA, Potischman N, Miller R, Schussler N, et al. Relationships of serum carotenoids, retinol,  $\alpha$ -tocopherol, and selenium with breast cancer risk: results from a prospective study in Columbia, Missouri (United States). *Cancer Causes Control* 1998;9:89–97.
- (83) London SJ, Stein EA, Henderson IC, Stampfer MJ, Wood WC, Remine S, et al. Carotenoids, retinol, and vitamin E and risk of proliferative benign breast disease and breast cancer. *Cancer Causes Control* 1992;3:503–12.
- (84) Potischman N, McCulloch CE, Byers T, Nemoto T, Stubbe N, Milch R, et al. Breast cancer and dietary and plasma concentrations of carotenoids and vitamin A. *Am J Clin Nutr* 1990;52:909–15.
- (85) Levy J, Bosin E, Feldman B, Giat Y, Miinster A, Danilenko M, et al. Lycopene is a more potent inhibitor of human cancer cell proliferation than either  $\alpha$ -carotene or  $\beta$ -carotene. *Nutr Cancer* 1995;24:257–66.
- (86) Sharoni Y, Giron E, Rise M, Levy J. Effects of lycopene-enriched tomato oleoresin on 7,12-dimethylbenz[*a*]anthracene-induced rat mammary tumors. *Cancer Detect Prev* 1997;21:118–23.
- (87) Marshall JR, Graham S, Byers T, Swanson M, Brasure J. Diet and smoking in the epidemiology of cancer of the cervix. *J Natl Cancer Inst* 1983;70:847–51.
- (88) de Vet HC, Knipschild PG, Grol ME, Schouten HJ, Sturmans F. The role of beta-carotene and other dietary factors in the aetiology of cervical dysplasia: results of a case-control study. *Int J Epidemiol* 1991;20:603–10.
- (89) Potischman N, Herrero R, Brinton LA, Reeves WC, Stacewicz-Sapuntzakis M, Jones CJ, et al. A case-control study of nutrient status and invasive cervical cancer. II. Serological indicators. *Am J Epidemiol* 1991;134:1347–55.
- (90) Batiha AM, Armenian HK, Norkus EP, Morris JS, Spate VE, Comstock GW. Serum micronutrients and the subsequent risk of cervical cancer in a population-based nested case-control study. *Cancer Epidemiol Biomarkers Prev* 1993;2:335–9.
- (91) VanEenwyk J, Davis FG, Bowen PE. Dietary and serum carotenoids and cervical intraepithelial neoplasia. *Int J Cancer* 1991;48:34–8.
- (92) Helzlsouer KJ, Alberg AJ, Norkus EP, Morris JS, Hoffman SC, Comstock GW. Prospective study of serum micronutrients and ovarian cancer. *J Natl Cancer Inst* 1996;88:32–7.
- (93) Campbell DR, Gross MD, Martini MC, Grandits GA, Slavin JL, Potter JD. Plasma carotenoids as biomarkers of vegetable and fruit intake. *Cancer Epidemiol Biomarkers Prev* 1994;3:493–500.
- (94) Michaud DS, Giovannucci EL, Ascherio A, Rimm EB, Forman MR, Sampson L, et al. Associations of plasma carotenoid concentrations and dietary intake of specific carotenoids in samples of two prospective cohort studies using a new carotenoid database. *Cancer Epidemiol Biomarkers Prev* 1998;7:283–90.
- (95) Brady WE, Mares-Perlman JA, Bowen P, Stacewicz-Sapuntzakis M. Human serum carotenoid concentrations are related to physiologic and lifestyle factors. *J Nutr* 1996;126:129–37.
- (96) Kim DJ, Takasuka N, Kim JM, Sekine K, Ota T, Asamoto M, et al. Chemoprevention by lycopene of mouse lung neoplasia after combined initiation treatment with DEN, MNU and DMH. *Cancer Lett* 1997;120:15–22.
- (97) Beecher GR. Nutrient content of tomatoes and tomato products. *Proc Soc Exp Biol Med* 1998;218:98–100.
- (98) Krogh V, Freudenheim JL, D'Amicis A, Scaccini C, Sette S, Ferro-Luzzi

- A, et al. Food sources of nutrients of the diet of elderly Italians: II. Micronutrients. *Int J Epidemiol* 1993;22:869-77.
- (99) Khachik F, Beecher G, Smith JC Jr. Lutein, lycopene, and their oxidative metabolites in chemoprevention of cancer. *J Cell Biochem Suppl* 1995; 22:236-46.
- (100) Stahl W, Sies H. Perspectives in biochemistry and biophysics. Lycopene. A biologically important carotenoid for humans? *Arch Biochem Biophys* 1996;336:1-9.
- (101) Britton G. Structure and properties of carotenoids in relation to function. *FASEB J* 1995;9:1551-8.
- (102) Woodall AA, Lee SW, Weesie RJ, Jackson MJ, Britton G. Oxidation of carotenoids by free radicals: relationship between structure and reactivity. *Biochim Biophys Acta* 1997;1336:33-42.
- (103) Mortensen A, Skibsted LH. Real time detection of reactions between radicals of lycopene and tocopherol homologues. *Free Radic Res* 1997; 27:229-34.
- (104) Conn PF, Schalch W, Truscott TG. The singlet oxygen and carotenoid interaction [published erratum appears in *J Photochem Photobiol B* 1993; 17:89]. *J Photochem Photobiol B* 1991;11:41-7.
- (105) Ascherio A, Stampfer MJ, Colditz GA, Rimm EB, Litin L, Willett WC. Correlations of vitamin A and E intakes with the plasma concentrations of carotenoids and tocopherols among American men and women. *J Nutr* 1992;122:1792-1801.
- (106) Kaplan LA, Stein EA, Willett WC, Stampfer MJ, Stryker WS. Reference ranges of retinol, tocopherols, lycopene and alpha- and beta-carotene in plasma by simultaneous high-performance liquid chromatographic analysis. *Clin Physiol Biochem* 1987;5:297-304.
- (107) Stryker WS, Kaplan LA, Stein EA, Stampfer MJ, Sober A, Willett WC. The relation of diet, cigarette smoking, and alcohol consumption to plasma beta-carotene and alpha-tocopherol levels. *Am J Epidemiol* 1988; 127:283-96.
- (108) Clinton SK, Emenhiser C, Schwartz SJ, Bostwick DG, Williams AW, Moore BJ, et al. *cis-trans* lycopene isomers, carotenoids, and retinol in the human prostate. *Cancer Epidemiol Biomarkers Prev* 1996;5:823-33.
- (109) Kaplan LA, Lau JM, Stein EA. Carotenoid composition, concentrations, and relationships in various human organs. *Clin Physiol Biochem* 1990; 8:1-10.
- (110) Cerutti PA. Prooxidant states and tumor promotion. *Science* 1985;227: 375-81.
- (111) Wiseman H, Halliwell B. Damage to DNA by reactive oxygen and nitrogen species: role in inflammatory disease and progression to cancer. *Biochem J* 1996;313:17-29.
- (112) Ames BN, Shigenaga MK, Hagen TM. Oxidants, antioxidants, and the degenerative diseases of aging. *Proc Natl Acad Sci U S A* 1993;90: 7915-22.
- (113) Halliwell B Gutteridge JM. Free radicals in biology and medicine. 2nd ed. New York: Oxford University Press; 1989.
- (114) Schmitz HH, Poor CL, Wellman RB, Erdman JW Jr. Concentrations of selected carotenoids and vitamin A in human liver, kidney and lung tissue. *J Nutr* 1991;121:1613-21.
- (115) Bohm F, Tinkler JH, Truscott TG. Carotenoids protect against cell membrane damage by the nitrogen dioxide radical [letter]. *Nat Med* 1995;1: 98-9.
- (116) Parsonnet J. Bacterial infection as a cause of cancer [published erratum appears in *Environ Health Perspect* 1996;104 Suppl 3: following table of contents]. *Environ Health Perspect* 1995;103 suppl 8:263-8.
- (117) Baik SC, Youn HS, Chung MH, Lee WK, Cho MJ, Ko GH, et al. Increased oxidative DNA damage in *Helicobacter pylori*-infected human gastric mucosa. *Cancer Res* 1996;56:1279-82.
- (118) Atanasova-Goranova VK, Dimova PI, Pevicharova GT. Effect of food products on endogenous generation of *N*-nitrosamines in rats. *Br J Nutr* 1997;78:335-45.
- (119) Ripple MO, Henry WF, Rago RP, Wilding G. Prooxidant-antioxidant shift induced by androgen treatment of human prostate carcinoma cells. *J Natl Cancer Inst* 1997;89:40-8.
- (120) Malins DC, Polissar NL, Gunselman SJ. Models of DNA structure achieve almost perfect discrimination between normal prostate, benign prostatic hyperplasia (BPH), and adenocarcinoma and have a high potential for predicting BPH and prostate cancer. *Proc Natl Acad Sci U S A* 1997;94:259-64.
- (121) Bisby RH Parker AW. Reaction of ascorbate with alpha-tocopheroxyl radical in micellar and bilayer membrane systems. *Arch Biochem Biophys* 1995;317:170-8.
- (122) Chan JM, Stampfer MJ, Giovannucci E, Gann PH, Ma J, Wilkinson P, et al. Plasma insulin-like growth factor-I and prostate cancer risk: a prospective study. *Science* 1998;279:563-6.
- (123) Gerster H. The potential role of lycopene for human health. *J Am Coll Nutr* 1997;16:109-26.
- (124) Clinton SK. Lycopene: chemistry, biology, and implications for human health and disease. *Nutr Rev* 1998;56:35-51.
- (125) Pool-Zobel BL, Bub A, Muller H, Wollowski I, Rechkemmer G. Consumption of vegetables reduces genetic damage in humans: first results of a human intervention trial with carotenoid-rich foods. *Carcinogenesis* 1997;18:1847-50.

## NOTES

Supported by Public Health Service grants CA55075, CA72036, CA76622, and CA67883 (National Cancer Institute) and HL35464 (National Heart, Lung, and Blood Institute), National Institutes of Health, Department of Health and Human Services.

I thank Kathleen Markham for her outstanding technical support.

Manuscript received July 24, 1998; revised November 5, 1998; accepted December 30, 1998.
